# Supplementary material for: Defective Neurogenesis in Lowe Syndrome is Caused by Mitochondria Loss and Cilia-related Sonic Hedgehog Defects
Source: PubMed Central journal article supplement (PMC11565974; doi:10.1101/2024.11.01.621496), 2024-11-01
Supplement: NIHPP2024.11.01.621496v1-supplement-1.pdf [file NIHPP2024.11.01.621496v1-supplement-1.pdf]

630 **Supplementary files**

631

632 **Supplementary Figure 1. qPCR primers for iPSCs.**

| <b>iPSCs-QPCR primer</b> | <b>primer (5' to 3')</b>        |
|--------------------------|---------------------------------|
| <i>Foxg1-F</i>           | CCTGCCCTGTGAGTCTTTAAG           |
| <i>Foxg1-R</i>           | GTTCACTTACAGTCTGGTCCC           |
| <i>Neun-F</i>            | GTAGAGGGACGGAAAATTGAGG          |
| <i>Neun-R</i>            | CATAGAATTCAGGCCCGTAGAC          |
| <i>Brn2-F</i>            | AAAGTAACTGTCAAATGCGCG           |
| <i>Brn2-R</i>            | GCTGTAGTGGTTAGACGCTG            |
| <i>Gfap-F</i>            | CCTCCAGCGATTCAACCTTT            |
| <i>Gfap-R</i>            | GAAGCTCCAAGATGAAACCAAC          |
| <i>Co2-F</i>             | CCCCACATTAGGCTTAAAAACAGAT       |
| <i>Co2-R</i>             | TATACCCCCGGTCGTGTAGCGGT         |
| <i>Dloop-F</i>           | TATCTTTTGGCGGTATGCACTTTTAAACAGT |

633

---

|                        |                            |
|------------------------|----------------------------|
| <b><i>Dloop-R</i></b>  | TGATGAGATTAGTAGTATGGGAGTGG |
| <b><i>Shh-F</i></b>    | CGGAGCGAGGAAGGGAAAG        |
| <b><i>Shh-R</i></b>    | TTGGGGATAAACTGCTTGTAGGC    |
| <b><i>Gli1-F</i></b>   | TCTGCCCCCAATTGCCCACTTG     |
| <b><i>Gli1-R</i></b>   | TACATAGCCCCCAGCCCATACCTC   |
| <b><i>Patch1-F</i></b> | CGGCGTTCTCAATGGGCTGGTTTT   |
| <b><i>Patch1-R</i></b> | GTGGGGCTGCTGTTTCGGGTTTCG   |
| <b><i>Actin-F</i></b>  | TCACCCACACTGTGCCCATCTACGA  |
| <b><i>Actin-R</i></b>  | CAGCGGAACCGCTCATTGCCAATGG  |

---

635 **Supplementary Figure 2. qPCR primers for wild-type and IOB mouse.**

636

| <b>WT and IOB mouse -qPCR primer</b> | <b>primer (5' to 3')</b>   |
|--------------------------------------|----------------------------|
| <i>neun-F</i>                        | GTTGCCTACCGGGGTGCACAC      |
| <i>neun-R</i>                        | TGCTCCAGTGCCGCTCCATAAG     |
| <i>pax6-F</i>                        | GTTCCCTGTCCTGTGGACTC       |
| <i>pax6-R</i>                        | ACCGCCCTTGGTTAAAGTCT       |
| <i>brn2-F</i>                        | AGAGCCCAAGGCAGAAAAGT       |
| <i>brn2-R</i>                        | GGCGCTCTGGTTAAAGGAG        |
| <i>gfap-F</i>                        | GGACTGAACCATGTCCTTTGTC     |
| <i>gfap-R</i>                        | AGGCTAGCTCTATCGGTATAACCTAA |
| <i>Mito1-F</i>                       | CTAGAAACCCCGAAACCAA        |
| <i>Mito1-R</i>                       | CCAGCTATCACCAAGCTCGT       |
| <i>Cox1-F</i>                        | TGCTAGCCGCAGGCATTACT       |
| <i>Cox1-R</i>                        | CGGGATCAAAGAAAGTTGTGT      |
| <i>gli1-F</i>                        | TTATGGAGCAGCCAGAGAGA       |
| <i>gli1-R</i>                        | GAGCCCGCTTCTTTGTTAAT       |
| <i>gli2-F</i>                        | TGAAGGATTCCTGCTCGTG        |
| <i>gli2-R</i>                        | GAAGTTTTCCAGGACAGAACCA     |
| <i>gli3-F</i>                        | AAGCGGTCCAAGATCAAGC        |
| <i>gli3-R</i>                        | TGTTCCCTTCCGGCTGTTC        |
| <i>patch1-F</i>                      | TGACAAAGCCGACTACATGC       |
| <i>patch1-R</i>                      | AGCGTACTCGATGGGCTCT        |
| <i>gapdh-F</i>                       | CATCACTGCCACCCAGAAGACTG    |
| <i>gapdh- R</i>                      | ATGCCAGTGAGCTTCCCGTTTCAG   |

637

638 **Supplementary Figure 3. Genotyping processing for wild-type and IOB**  
 639 **mouse.**

640 (a) Genotyping primers for wild-type and IOB mouse. (b) Genotyping  
 641 processing for wild-type and IOB mouse.

642

643

644 **(a) Genotyping primers**

| OCRL Wild-type (250 bp) | primer (5' to 3')           |
|-------------------------|-----------------------------|
| GT-F                    | CCCTTTTCATCTGTTAGGAGAAAT    |
| GT-R                    | GCATGGTTAAACGCACACTATGTGG   |
| OCRL KO (480 bp)        | primer (5' to 3')           |
| OCRL KO -F              | GCCCTTTGATTCTAATCCCTTTTCATC |
| OCRL KO -R              | TCTGAGCCCAGAAAGCGAAG        |

645

| Inpp5b (wt 150 bp/ mut 220 bp) | primer (5' to 3')     |
|--------------------------------|-----------------------|
| E25-F                          | TAAAGTCTGAAAATCCAAGGC |
| E34-R                          | CTCATTCTCCTTGATTCCAA  |

646

| INPP5B HumanBAC (240 bp) | primer (5' to 3')  |
|--------------------------|--------------------|
| in Exon 1F               | CCACCCCACGATTGACTC |
| in Exon 1R               | GGTGTCCCAGCCCTCAG  |

647

648 **(b) Genotyping processing**

649 Step 1 - OCRL WT

Step 2- OCRL KO

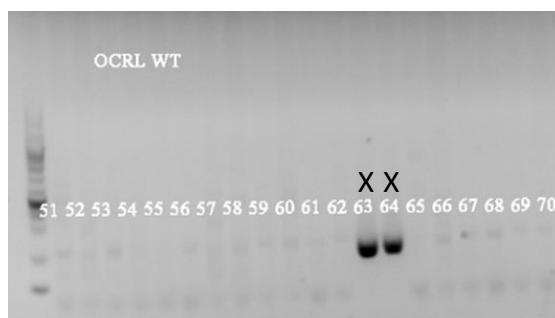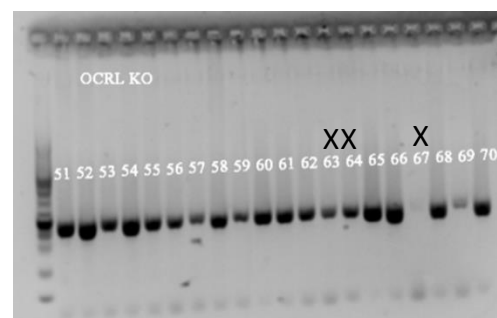

650

651 Step 3- Inpp5b (wt 150 bp/ mut 220 bp)

Step 4- INPP5B HumanBAC (240

652 bp)

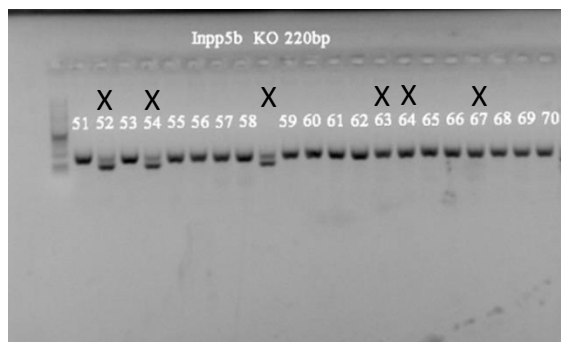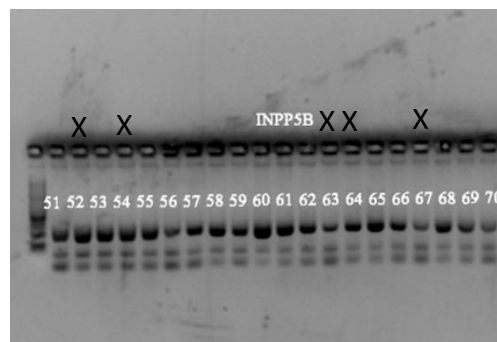

653

654

655
